# Supplementary figures and images for: Highly sensitive detection of hesperidin using AuNPs/rGO modified glassy carbon electrode
Source: Royal Society of Chemistry journal article supplement (doi:10.1039/c7an01706e), 2017-11-15

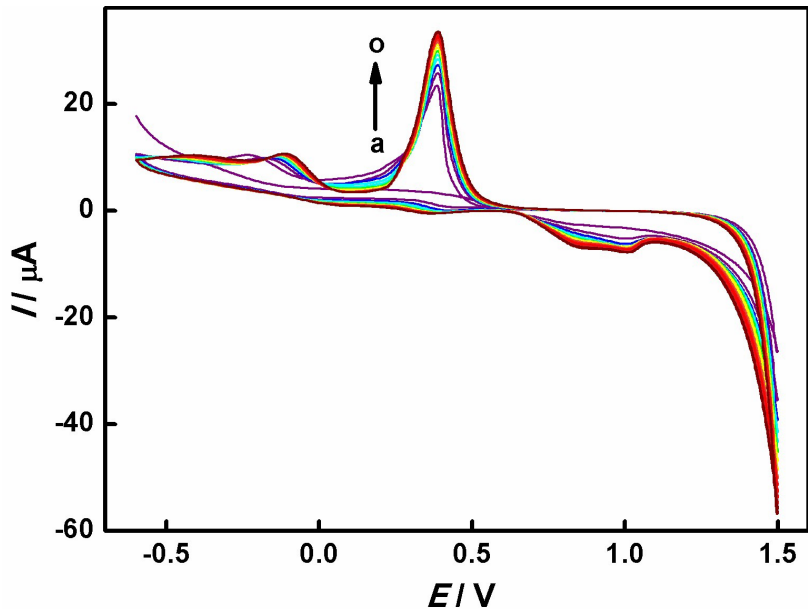

Supplement: c7an01706e2.pdf [file c7an01706e2.pdf]
